# Supplementary material for: A Novel HDL-Mimetic Peptide HM-10/10 Protects RPE and Photoreceptors in Murine Models of Retinal Degeneration
Source: Int J Mol Sci. 2019 Sep 27;20(19):4807. doi: 10.3390/ijms20194807 (PMC6801888; doi:10.3390/ijms20194807)
Supplement: Supplementary file 1 [file ijms-20-04807-s001.pdf]

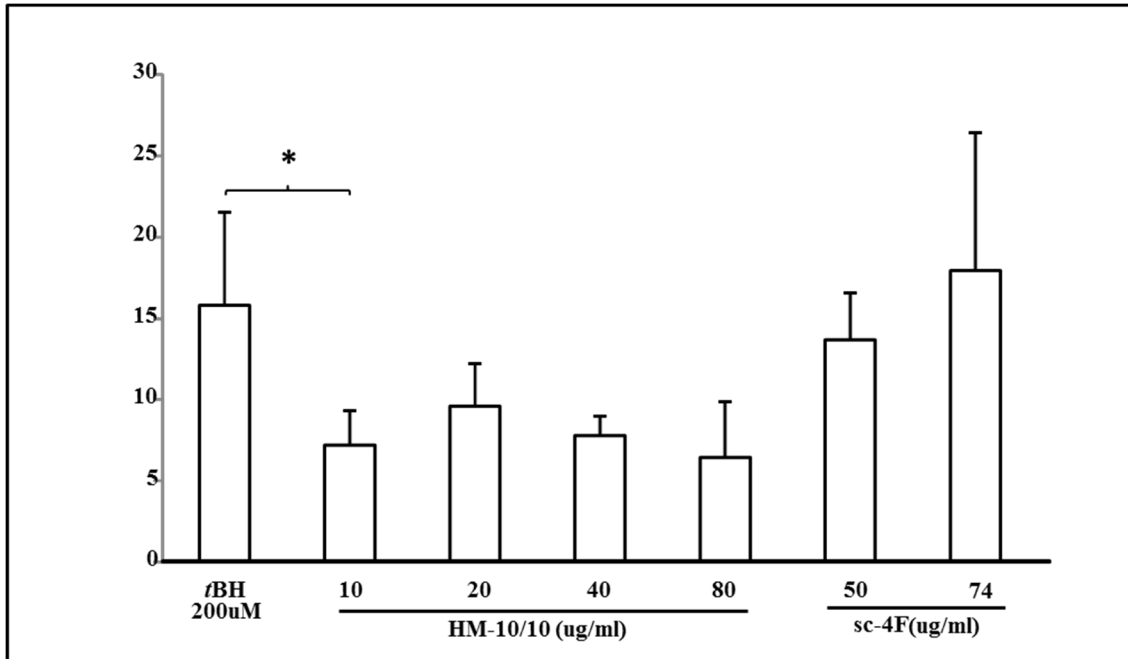

**Supplemental Figure S1.** Establishment of effective HM-10/10 dosing in hfrPE cells. hfrPE cells were incubated with HM-10/10 at 10, 20, 40, and 80 ug/mL or sc-4F at 50 or 74 ug/mL for 24 h as described under Materials and Methods. Apoptosis was analyzed and quantified by TUNEL staining. Asterisk indicates  $p < 0.0024$  with the Bonferroni correction.

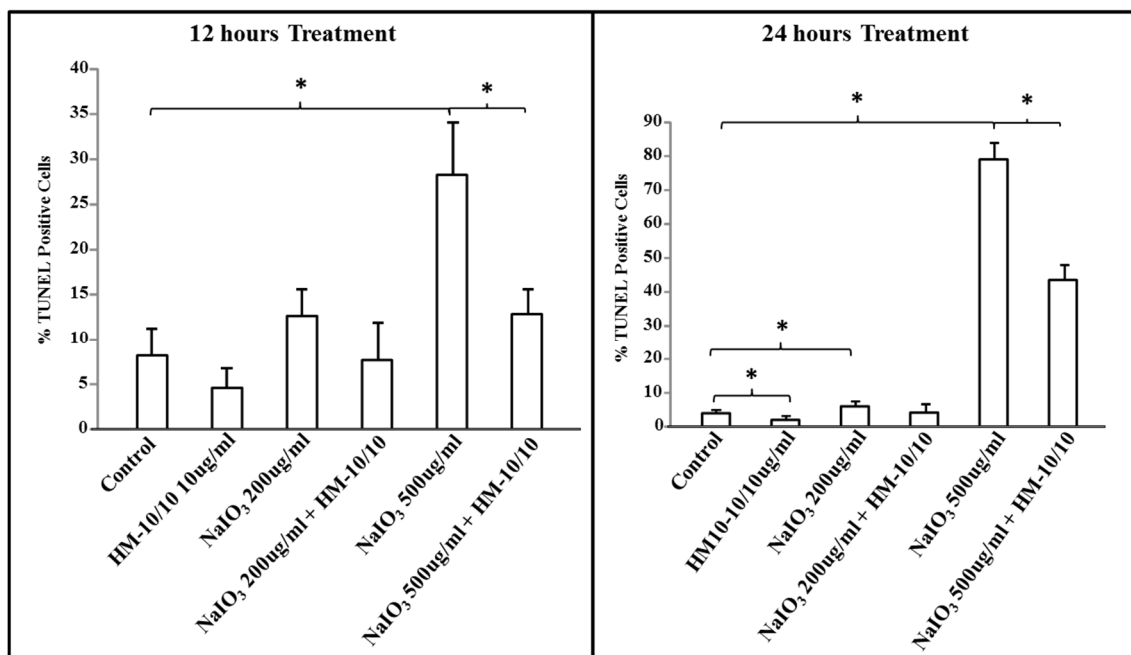

**Supplemental Figure S2.** HM-10/10 peptide mitigates NaIO<sub>3</sub>-induced apoptosis of hfrPE cells. hfrPE cells were incubated with HM-10/10 peptide at 10 ug/mL, or NaIO<sub>3</sub> at either 200ug/mL or 500ug/mL, or treated with NaIO<sub>3</sub> and HM-10/10 together, for 12 h or 24 h as described under Materials and Methods. Apoptosis was analyzed and quantified by TUNEL staining. Asterisk indicates  $p < 0.0036$  with the Bonferroni correction.

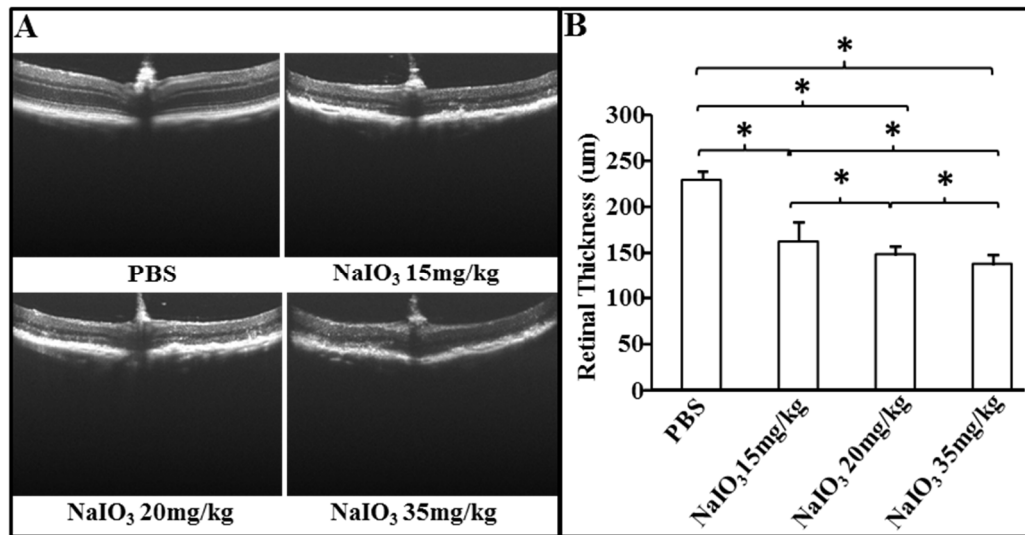

**Supplemental Figure S3.** Establishment of effective NaIO<sub>3</sub> dosing in C57BL6/J mice. C57BL6/J male mice were injected with different doses (as shown) of NaIO<sub>3</sub> via tail vein. After a week on a standard chow diet retinal damage was analyzed. (A) Representative OCT images. (B) Retinal thickness measured as described under Materials and Methods. Asterisk indicates  $p < 0.0083$  with the Bonferroni correction.
